# Supplementary material for: Characterization of a Wheat-Dasypyrum breviaristatum Chromosome Addition and Its Derived Progenies Carrying Novel Dasypyrum-Specific Gliadin Genes
Source: MDPI journal article supplement (doi:10.3390/agronomy12071673), 2022-07-13
Supplement: s1 [file s1]

Characterization of a wheat-*Dasypyrum breviaristatum* chromosome addition and its derived progenies carrying novel *Dasypyrum*-specific gliadin genes

Supplementary data

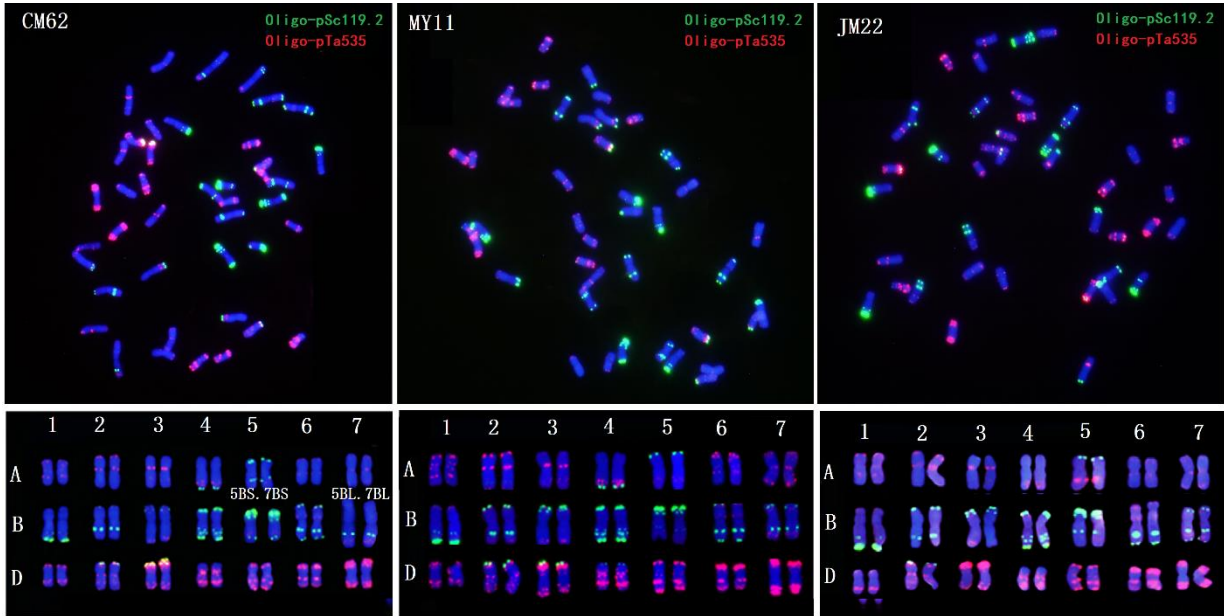

**Figure S1.** ND-FISH of mitotic metaphase of wheat parents CM62, MY11, and JM22 by probes Oligo-pTa535 (red) + Oligo-pSc119.2 (green). The karyotype for CM62 (a, b), MY11 (c, d) and JM22 (e, f) are shown.

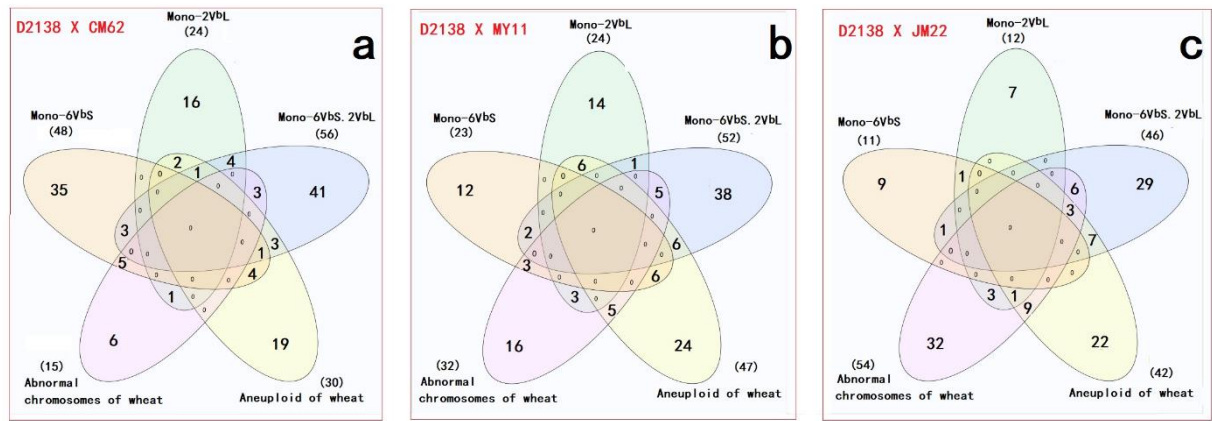

**Figure S2.** The distribution of different types of chromosome variation of F<sub>2</sub> plants derived from D2138 and three wheat hybrids.

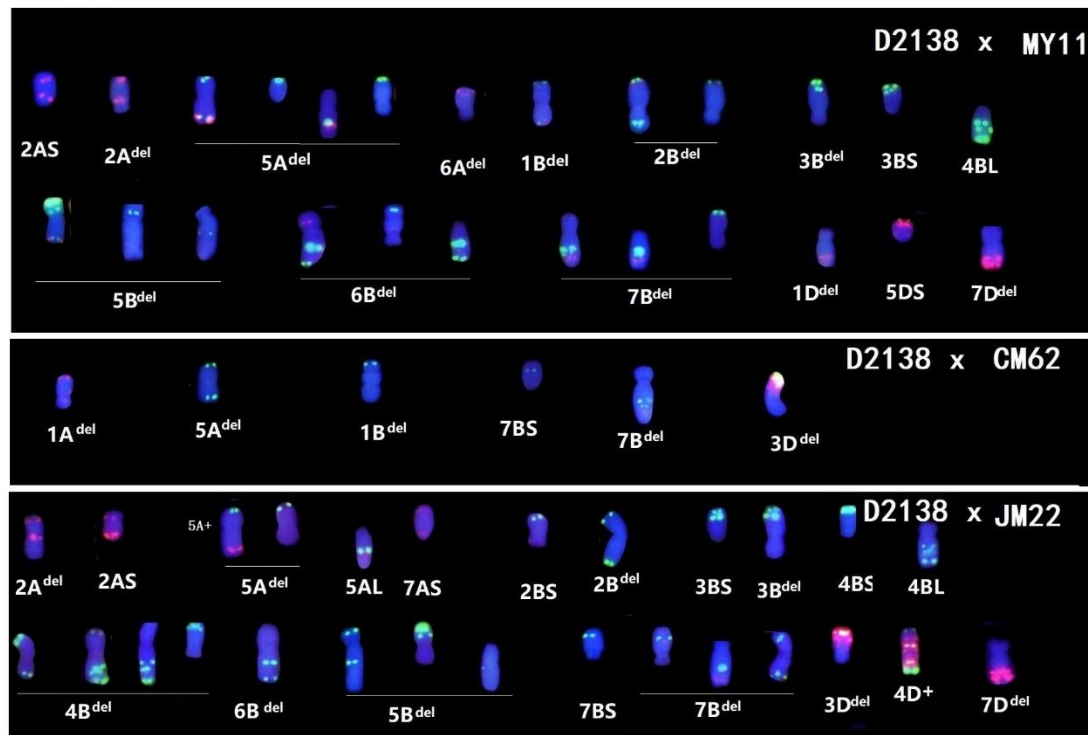

**Figure S3.** The wheat chromosome variations from the F<sub>2</sub> progenies between D2138 and three wheat lines. The probes Oligo-pTa535 and Oligo-pSc119.2 were used for ND-FISH.

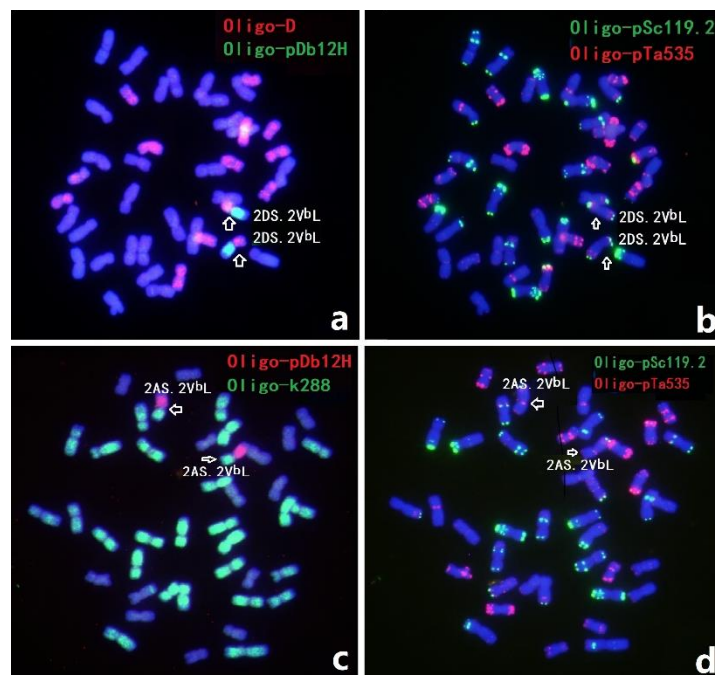

**Figure S4.** FISH of wheat-*D. breviaristatum* 2VbL translocation lines D310 and D334 from F<sub>4</sub> progenies of D2138 and MY11 hybrids. The probes Oligo-D + Oligo-pDb12H (a), Oligo-k288 + Oligo-pDb12H (c), Oligo-pSc119.2 + Oligo-pTa535 (b, d) are used for ND-FISH, respectively. Lines D310 (a, b) and D334 (c, d) contained a pair of wheat-*D. breviaristatum* chromosome translocations 2DS.2VbL and 2AS.2VbL, respectively.

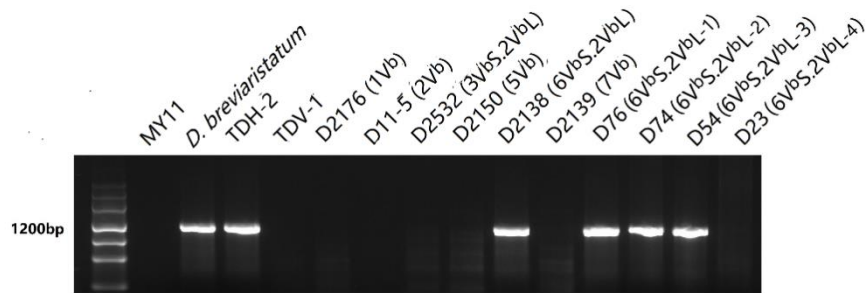

**Figure S5.** PCR amplification of *D. breviaristatum*-specific gliadin gene marker on wheat- *D. breviaristatum* introgression lines.

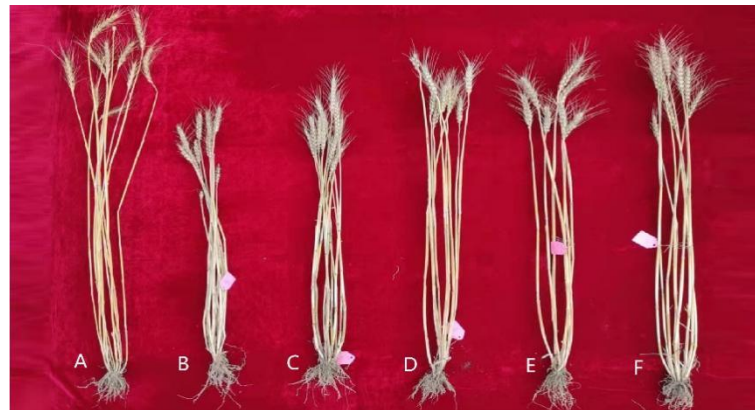

**Figure S6.** The adult plant morphology of the lines D2138, JM22, and their F<sub>2</sub> plants. A: D2138, B: JM22, C: F<sub>2</sub> missing 6V<sup>b</sup>S.2V<sup>b</sup>L, D: F<sub>2</sub> carrying mono- 6V<sup>b</sup>S, E: F<sub>2</sub> carrying mono- 2V<sup>b</sup>L, F: F<sub>2</sub> carrying 6V<sup>b</sup>S.2V<sup>b</sup>L.

**Table S1.** Chromosome number variation of F<sub>2</sub> plants derived from hybrids between D2138 and three wheat lines.

| Chromosome constitution | D2138 x CM62 | D2138 x JM22 | D2138 x MY11 | Total | Percentage of total |
|-------------------------|--------------|--------------|--------------|-------|---------------------|
| 40                      | 2            | 0            | 0            | 2     | 0.2                 |
| 41                      | 16           | 21           | 17           | 54    | 6.6                 |
| 42                      | 120          | 166          | 135          | 421   | 51.5                |
| 43                      | 53           | 38           | 41           | 132   | 16.1                |
| 44                      | 7            | 3            | 3            | 13    | 1.6                 |
| 40+1t                   | 1            | 0            | 0            | 1     | 0.1                 |
| 41+1t                   | 13           | 22           | 20           | 55    | 6.7                 |
| 42+1t                   | 43           | 18           | 27           | 88    | 10.8                |
| 43+1t                   | 12           | 2            | 3            | 17    | 2.1                 |
| 44+1t                   | 1            | 0            | 2            | 3     | 0.4                 |
| 40+2t                   | 1            | 0            | 3            | 4     | 0.5                 |
| 41+2t                   | 1            | 4            | 4            | 9     | 1.1                 |
| 42+2t                   | 0            | 7            | 6            | 13    | 1.6                 |
| 43+2t                   | 0            | 3            | 1            | 4     | 0.5                 |
| 44+2t                   | 0            | 2            | 0            | 2     | 0.2                 |
| Total                   | 270          | 286          | 262          | 818   |                     |
