# Supplementary material for: Characterization of a Wheat-Dasypyrum breviaristatum Chromosome Addition and Its Derived Progenies Carrying Novel Dasypyrum-Specific Gliadin Genes
Source: MDPI journal article supplement (doi:10.3390/agronomy12071673), 2022-07-13
Supplement: s1 [file s1]

Archive with 1 entries (1 files):
- agronomy-1777242-supplementary.pdf
